# Supplementary material for: Bcr-Abl tyrosine kinase inhibitor imatinib as a potential drug for COVID-19
Source: bioRxiv or medRxiv preprint supplement (doi:10.1101/2020.06.18.158196), 2020-08-18
Supplement: Supplementary file [file media-1.pdf]

## Supplementary Data for

# **Bcr-Abl tyrosine kinase inhibitor imatinib as a potential drug for COVID-19**

**Authors:** Nirmitee Mulgaonkar<sup>1,#</sup>, Haoqi Wang<sup>1,#</sup>, Samavath Mallawarachchi<sup>1</sup>, Daniel Ruzek<sup>2,\*</sup>, Byron Martina<sup>3,\*</sup>, and Sandun Fernando<sup>1,\*</sup>

### **Affiliations**

<sup>1</sup>Biological and Agricultural Engineering Department, Texas A&M University, College Station, TX 77843, USA.

<sup>2</sup>Veterinary Research Institute, Brno, and Institute of Parasitology, Biology Centre of the Czech Academy of Sciences, Ceske Budejovice, Czech Republic.

<sup>3</sup>Artemis One Health Research Institute, Delft, The Netherlands.

#These authors contributed equally.

### **\*Corresponding authors**

Correspondence to Dr. Sandun Fernando (lead contact): [sfernando@tamu.edu](mailto:sfernando@tamu.edu)

Dr. Byron Martina: [b.martina@artemisonhealth.com](mailto:b.martina@artemisonhealth.com)

Dr. Daniel Ruzek: [ruzekd@paru.cas.cz](mailto:ruzekd@paru.cas.cz)

### **This PDF file includes:**

Tables S1 to S3

Figures. S1 to S4

Caption for Movie S1

References

**Table S1. Vina docking scores of the selected compounds.**

| Compounds                | SARS-CoV template        | SARS-CoV-2 template |
|--------------------------|--------------------------|---------------------|
|                          | Docking Score (kcal/mol) |                     |
| DMSO                     | -2.10                    | -1.90               |
| Antiviral825             | -6.90                    | -6.30               |
| Antiviral2038            | -6.30                    | -6.20               |
| Antiviral2981            | -6.80                    | -6.00               |
| ZINCFDA130 (ergotamine)  | -8.00                    | -7.70               |
| ZINCFDA515 (ponatinib)   | -8.47                    | -7.63               |
| ZINCFDA754 (imatinib)    | -7.50                    | -6.80               |
| ZINCFDA2083(glecaprevir) | -7.10                    | -7.20               |

**Table S2. MM-GBSA binding free energies of the selected compounds during the 5-10 ns simulation.**

| Compounds                 | Binding free energy (kcal/mol) | Library           | Standard deviation |
|---------------------------|--------------------------------|-------------------|--------------------|
| DMSO                      | 0.00832                        | Negative_control  | 0.07582208         |
| Antiviral825              | -32.07596                      | Enamine_antiviral | 4.970953           |
| Antiviral2038             | -36.91549                      | Enamine_antiviral | 3.323704           |
| Antiviral2981             | -26.22972                      | Enamine_antiviral | 4.193055           |
| ZINCFDA130 (ergotamine)   | -40.26142                      | ZINC15_FDA        | 8.50835            |
| ZINCFDA515 (ponatinib)    | -43.19959                      | ZINC15_FDA        | 3.46693            |
| ZINCFDA754 (imatinib)     | -40.45192                      | ZINC15_FDA        | 4.660994           |
| ZINCFDA2083 (glecaprevir) | -42.03294                      | ZINC15_FDA        | 4.354867           |

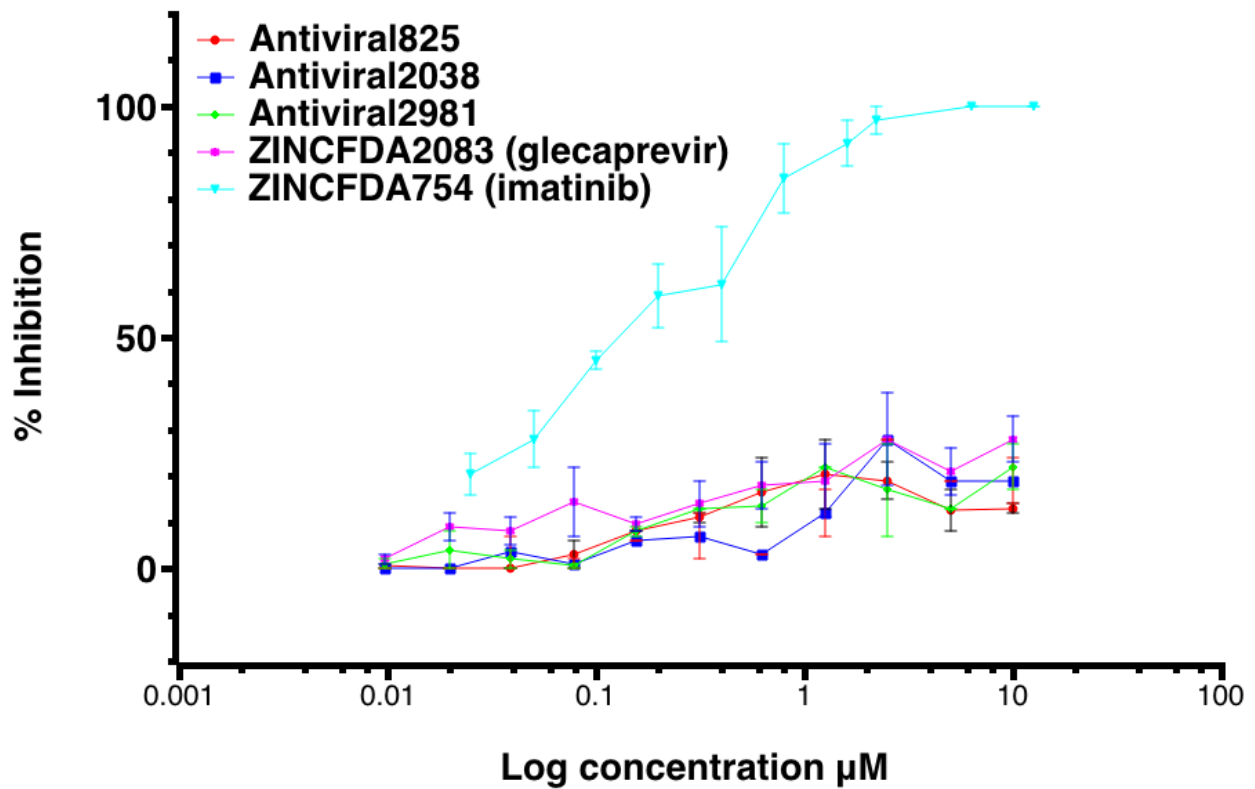

**Fig. S1.** Percent inhibition compared to the amount of plaques on cells. Here, 2-fold dilution of the compounds were done in duplo. Then 300 TCID<sub>50</sub> of SARS-CoV-2 was added to each well, and plates were incubated at 37C for 1 hour. Then, the mixes were added onto vero cells and incubated for 8 hours at 37 C. Subsequently, cells were fixed for 15 min with 2% PFA, followed by another 15 min fixation with 70% ethanol. Fixed cells were stained with a monoclonal antibody, followed by AlexaFluor 488. Here imatinib shows significant % inhibition as compared to other compounds tested.

ZINCFA754  
(imatinib)

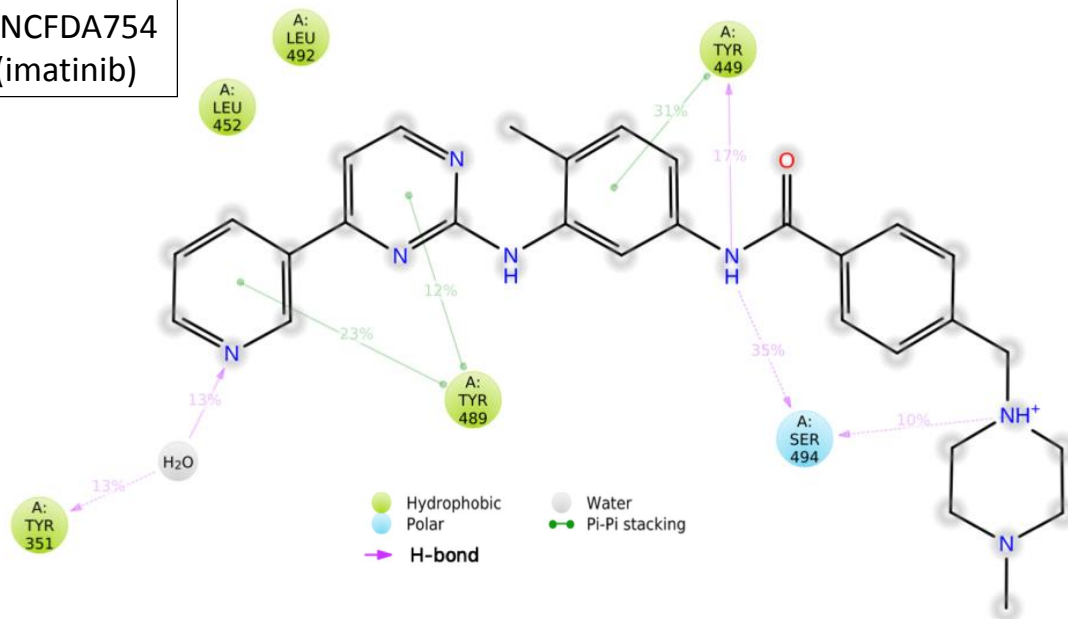

### Protein-Ligand Contacts

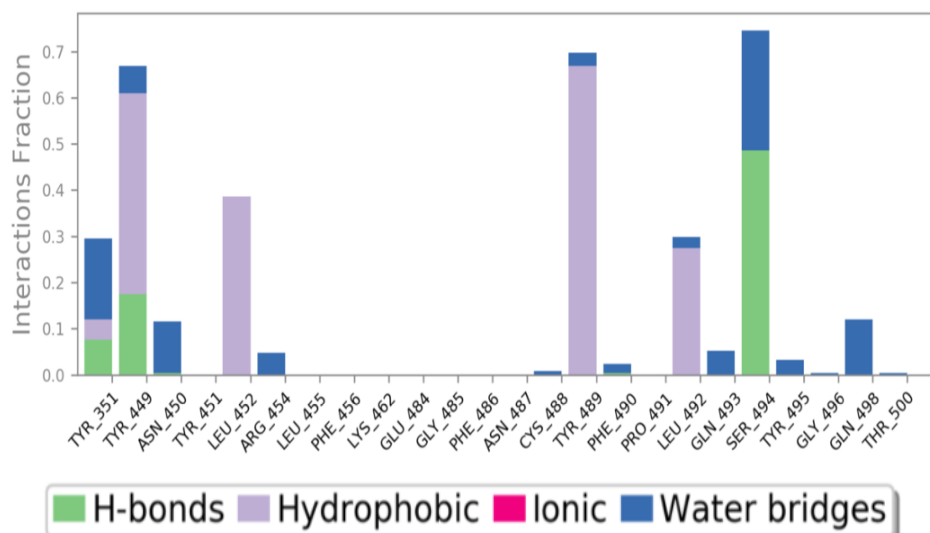

Antiviral2038

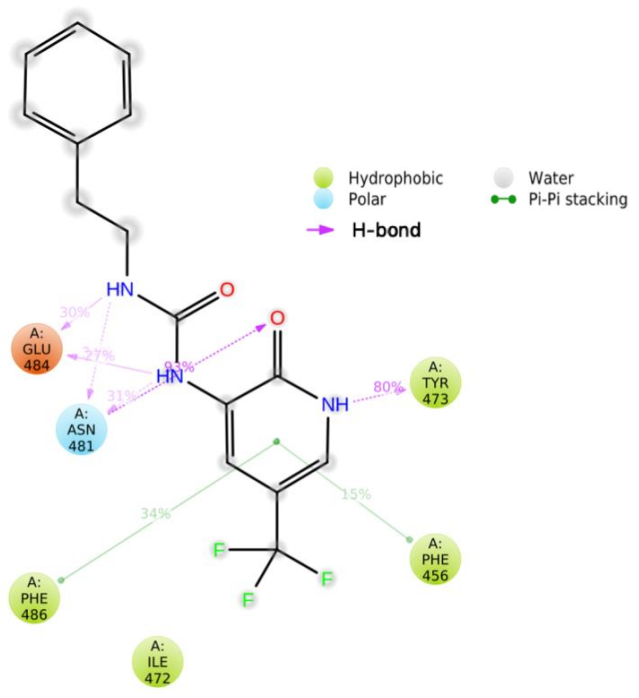

### Protein-Ligand Contacts

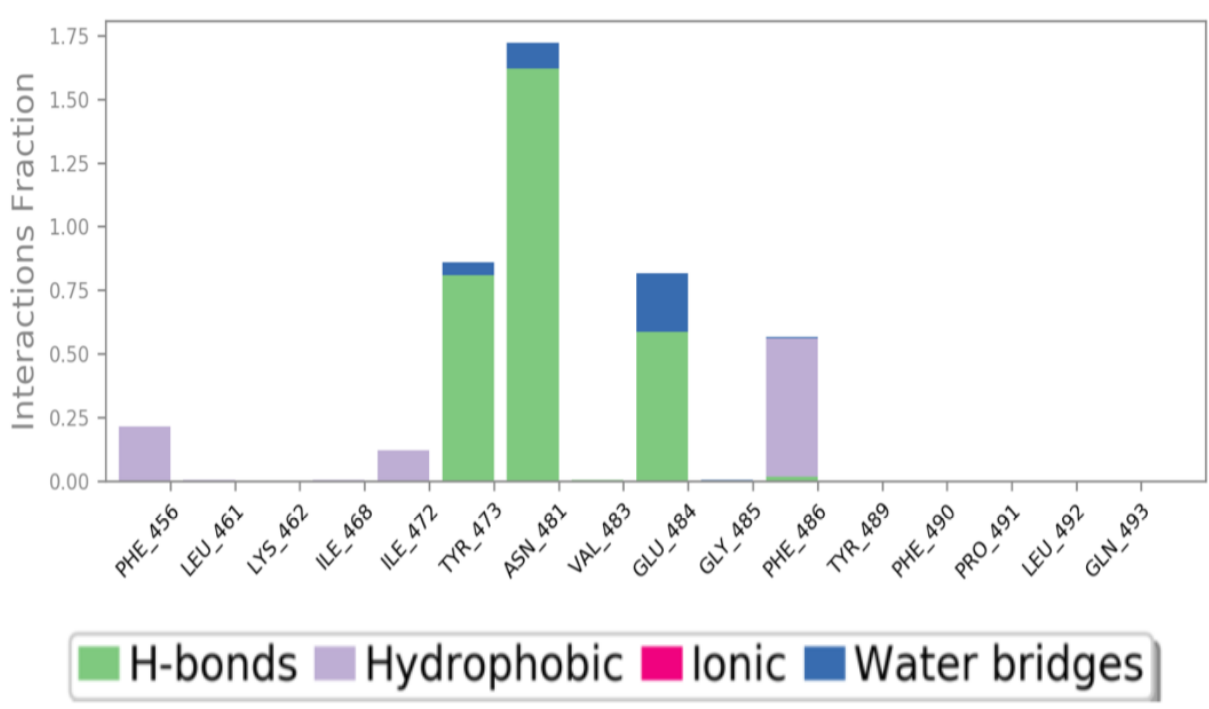

Antiviral825

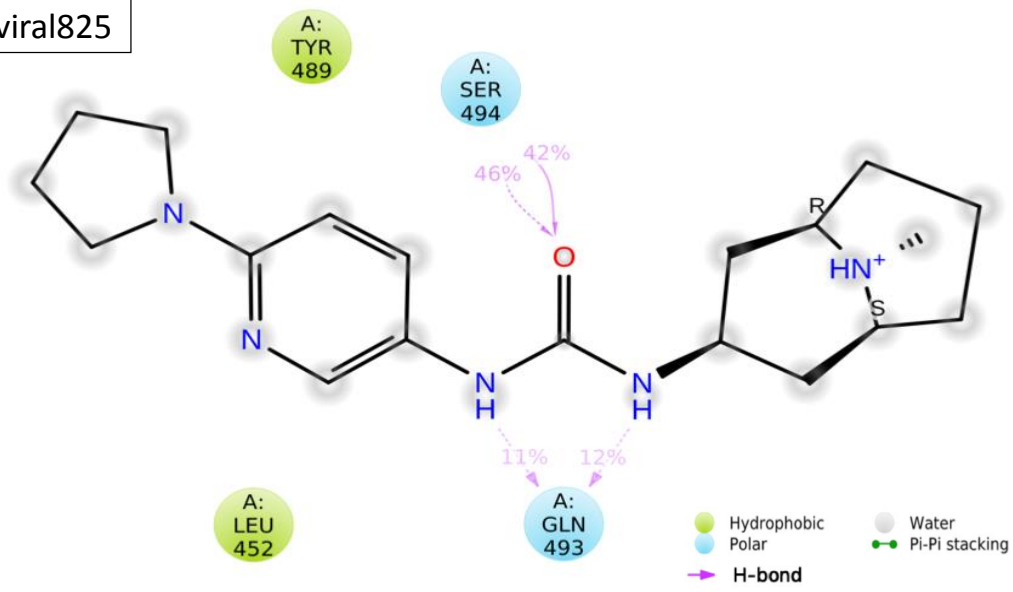

### Protein-Ligand Contacts

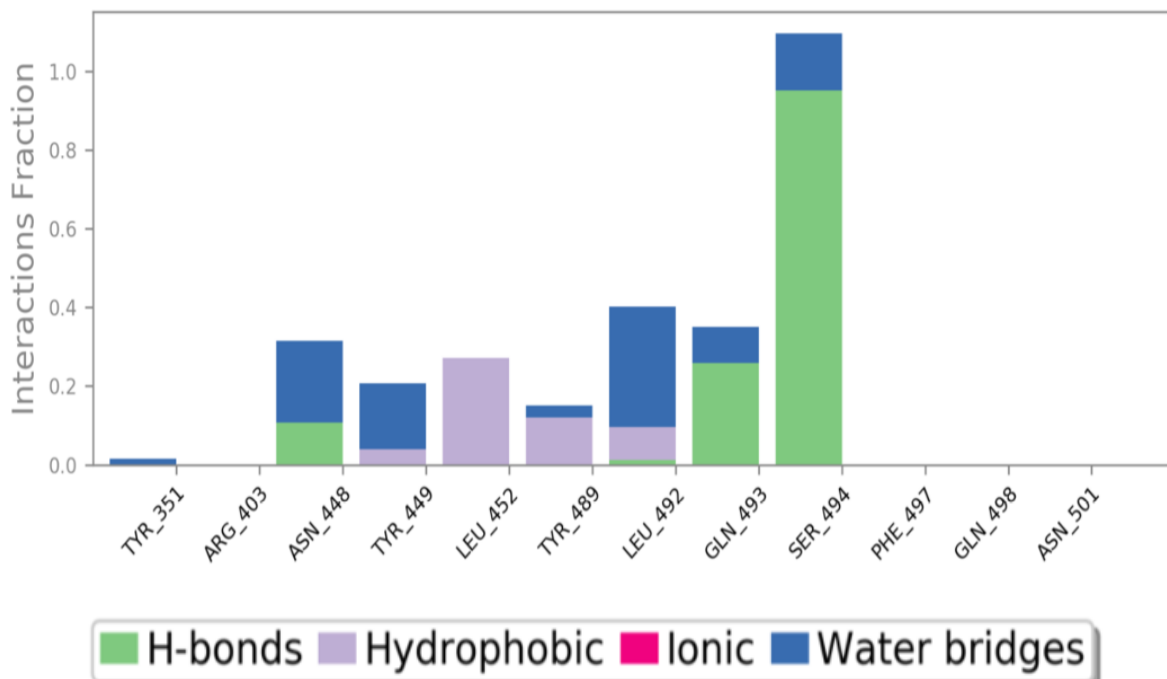

# Antiviral2981

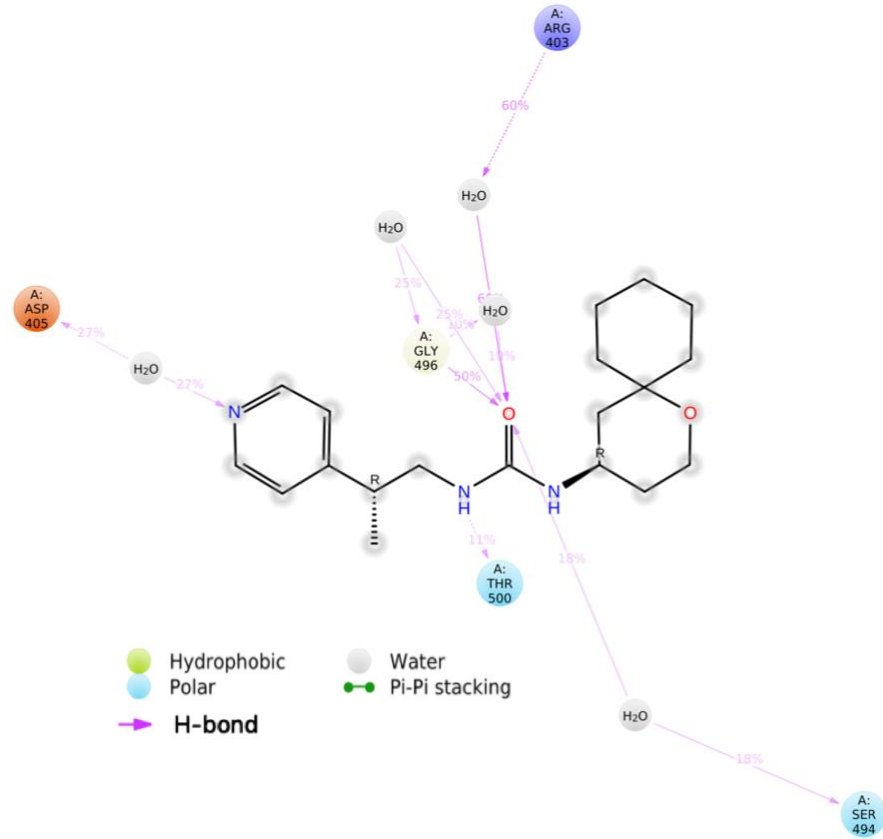

## Protein-Ligand Contacts

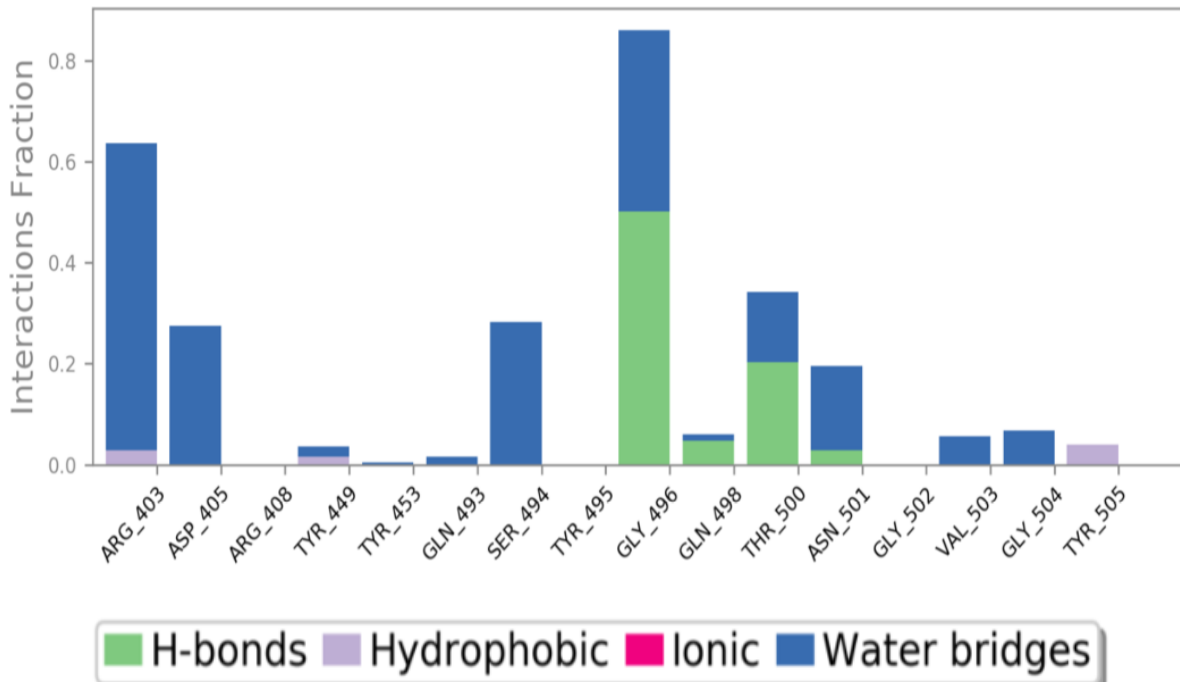

ZINCFDA130  
(ergotamine)

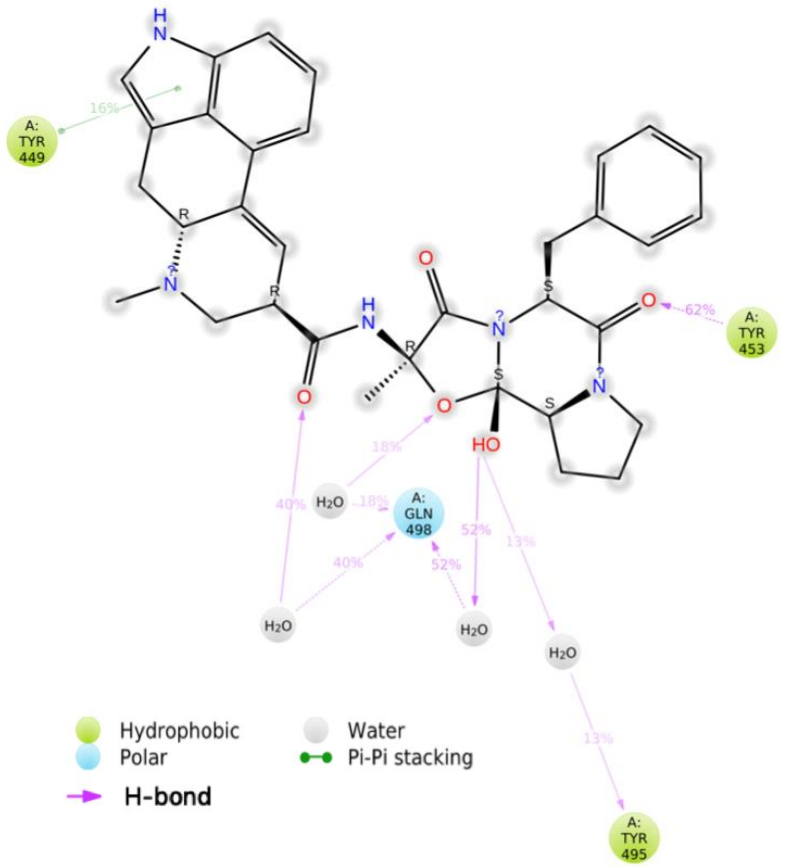

### Protein-Ligand Contacts

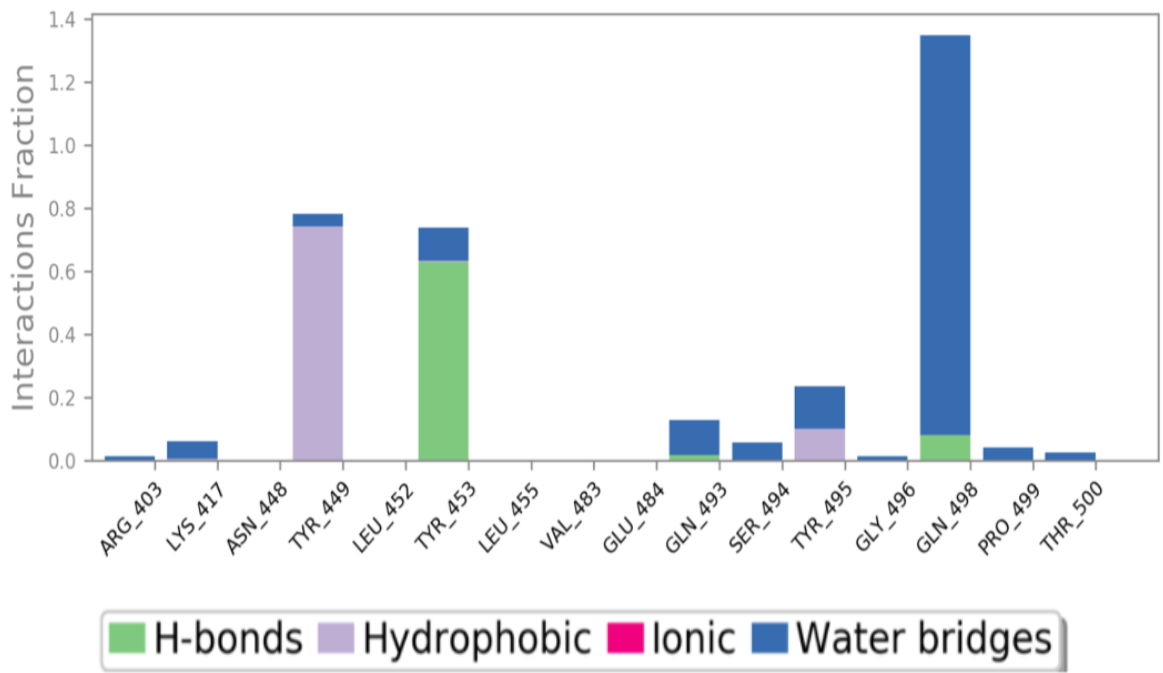



ZINCFA515  
(ponatinib)

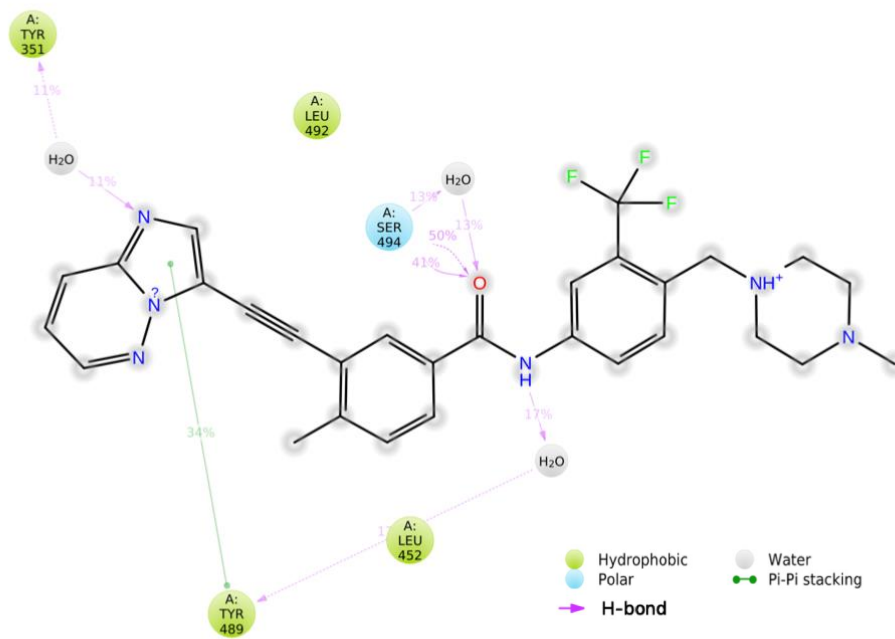

### Protein-Ligand Contacts

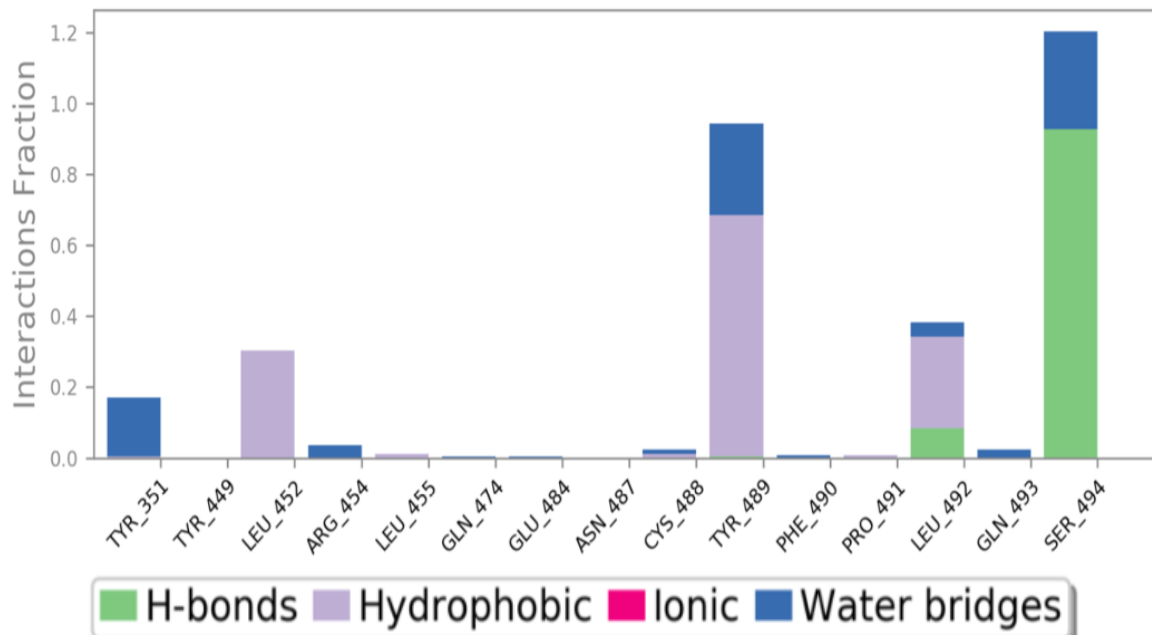

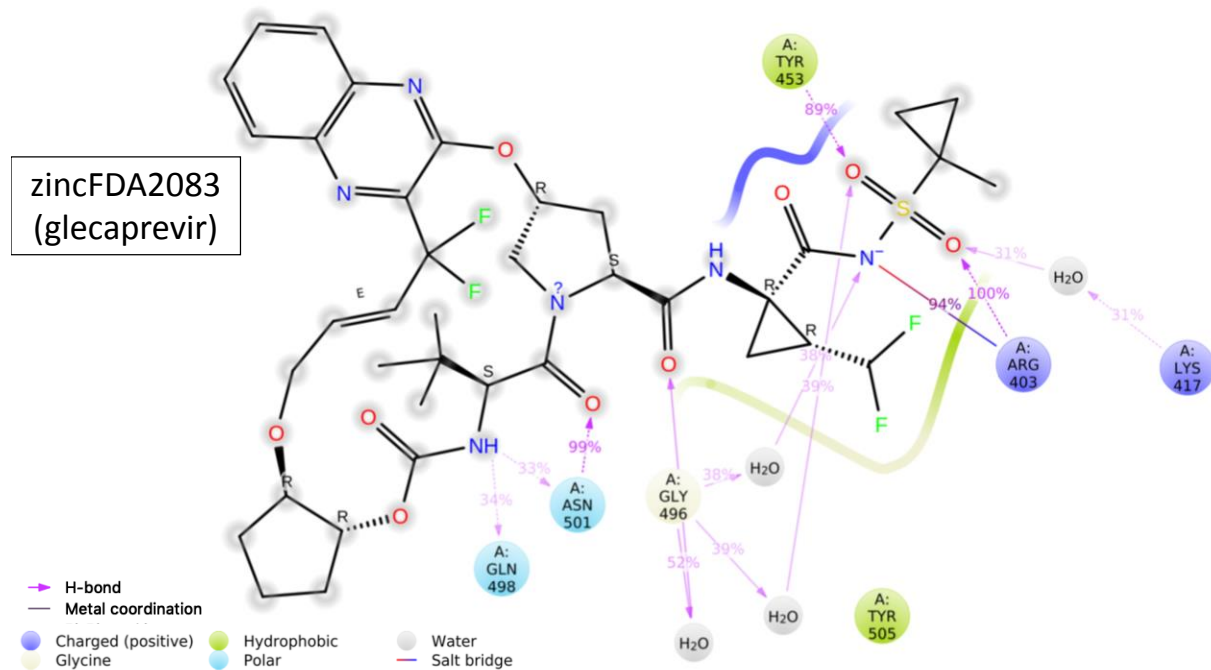

## Protein-Ligand Contacts

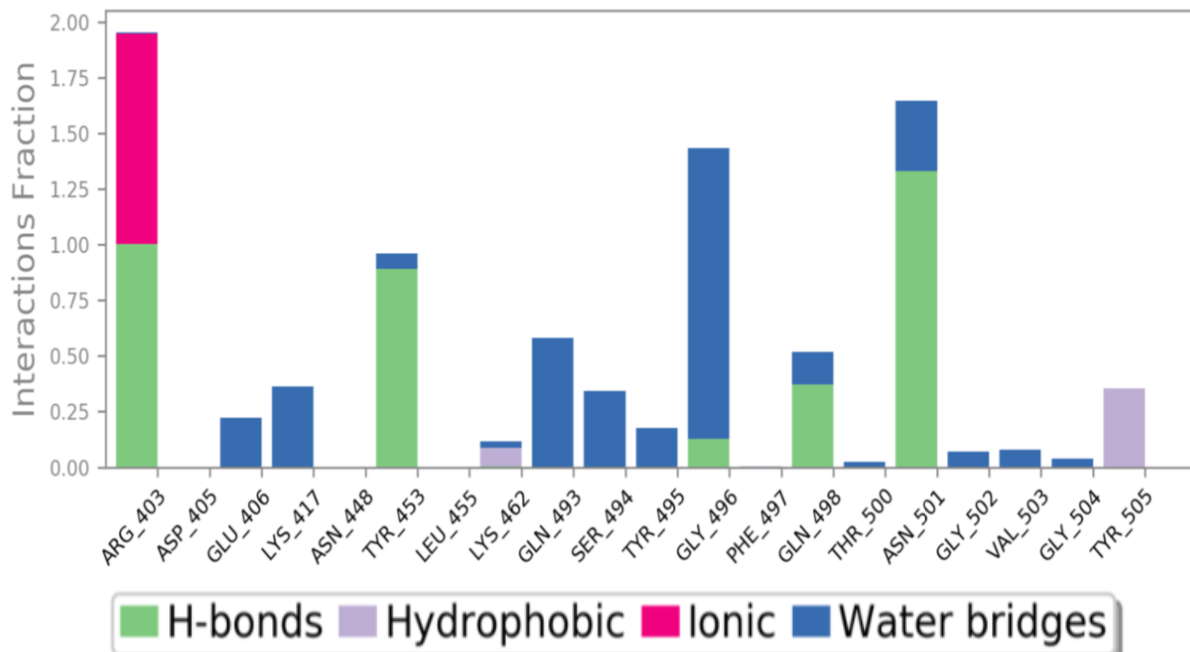

**Fig. S2** Interactions of the seven selected compounds with the RBD of SARS-CoV-2 spike protein

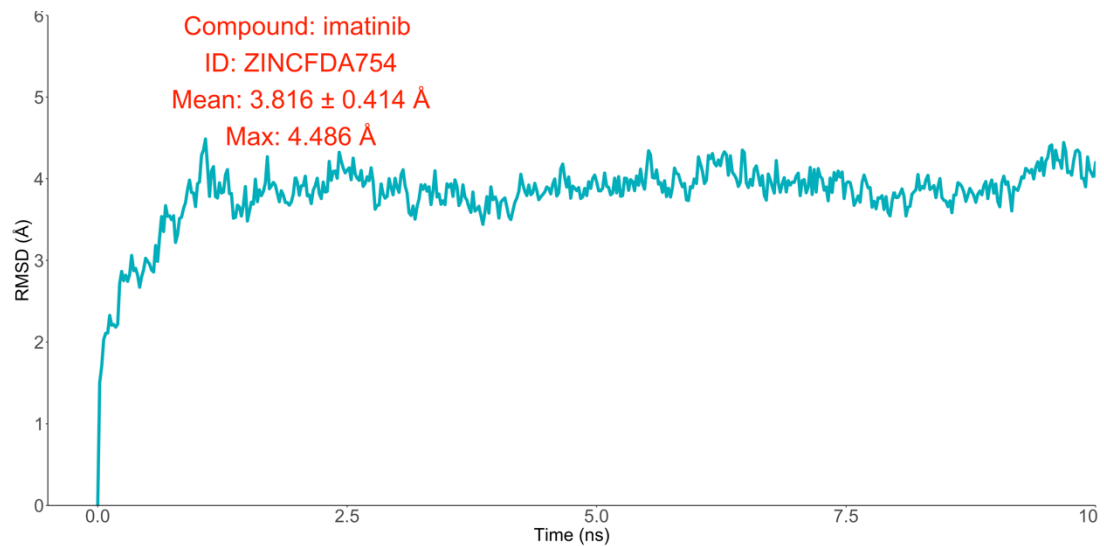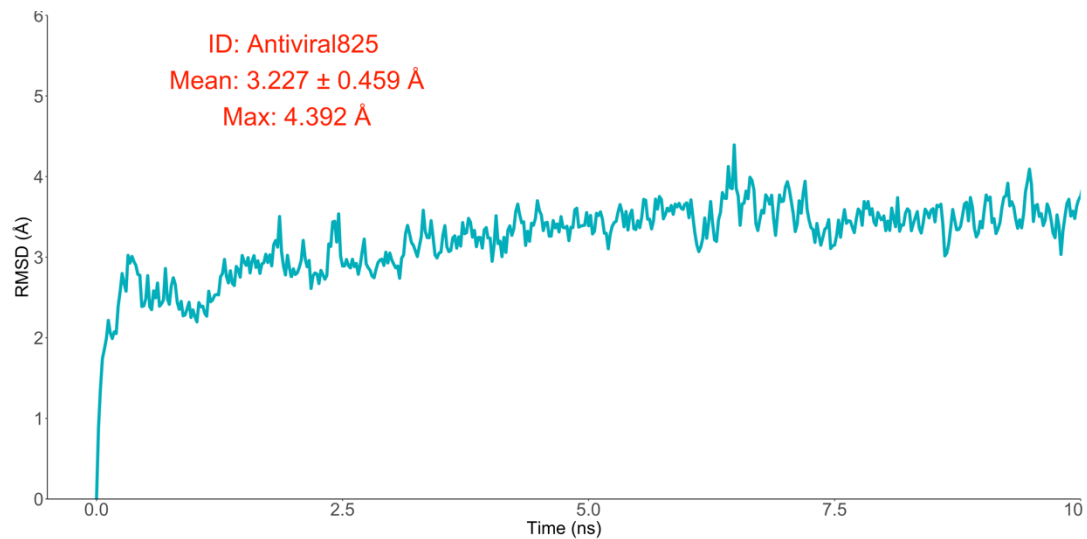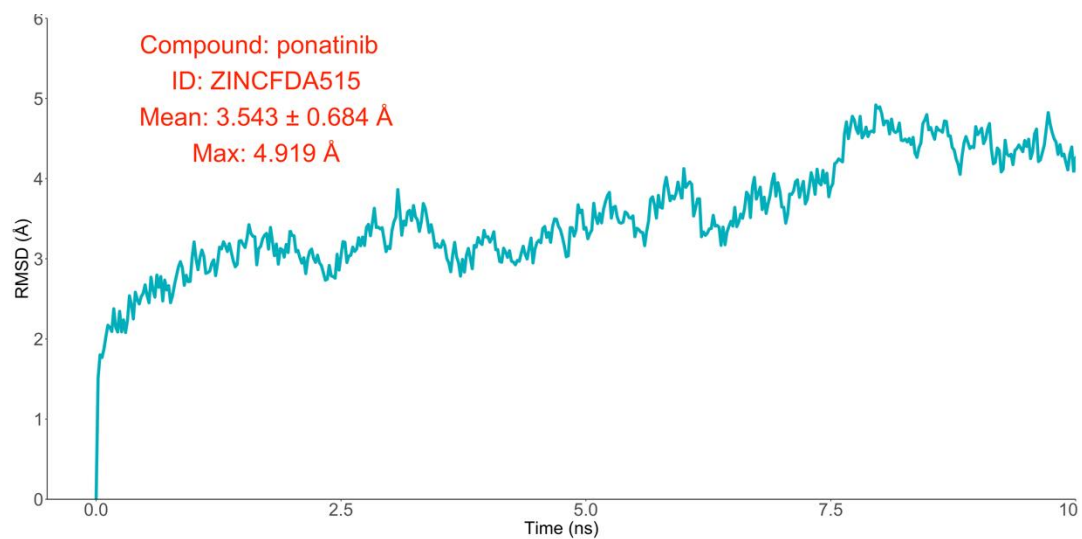

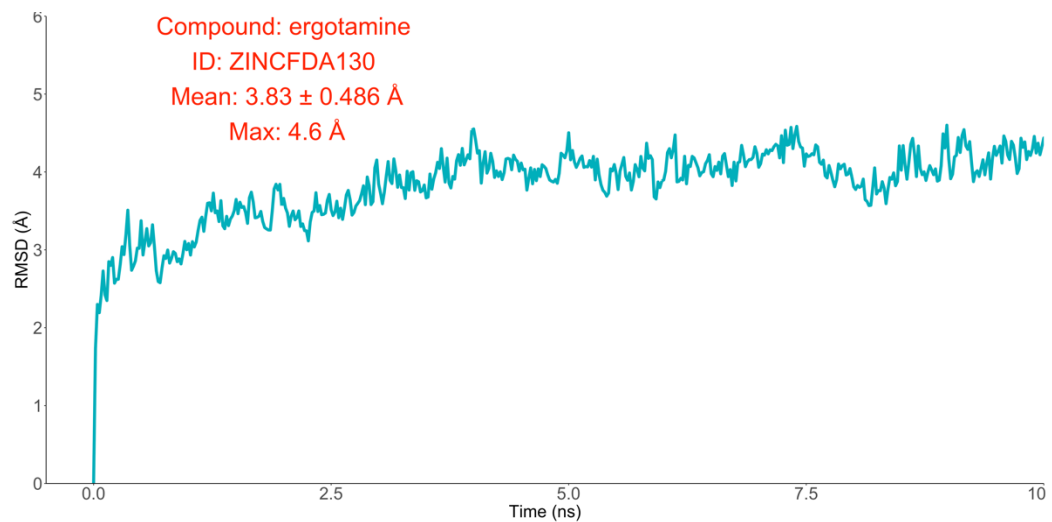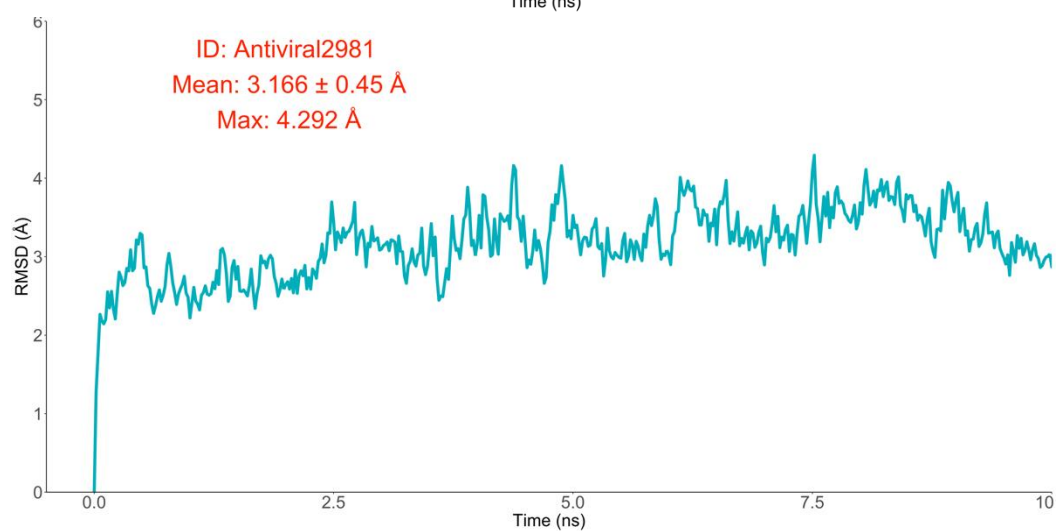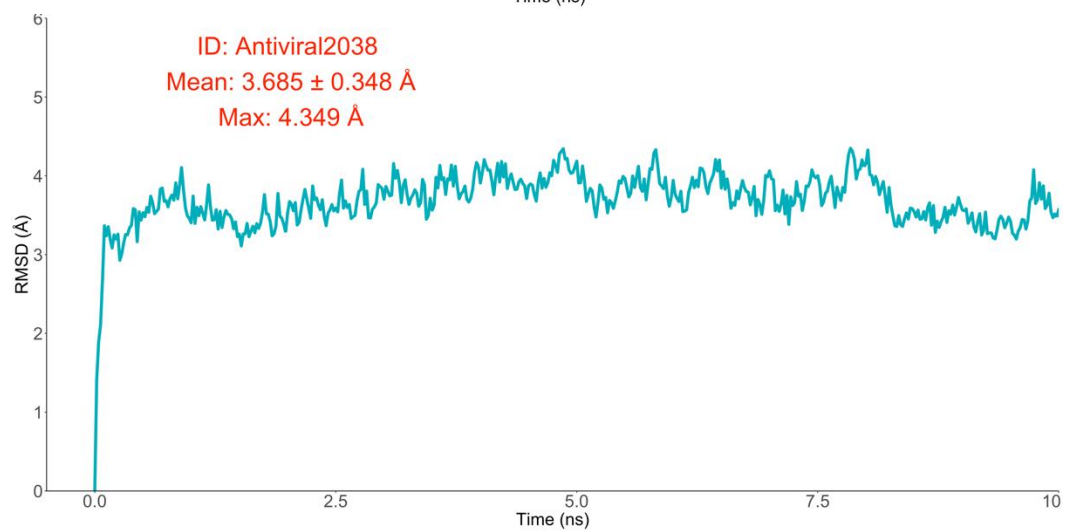

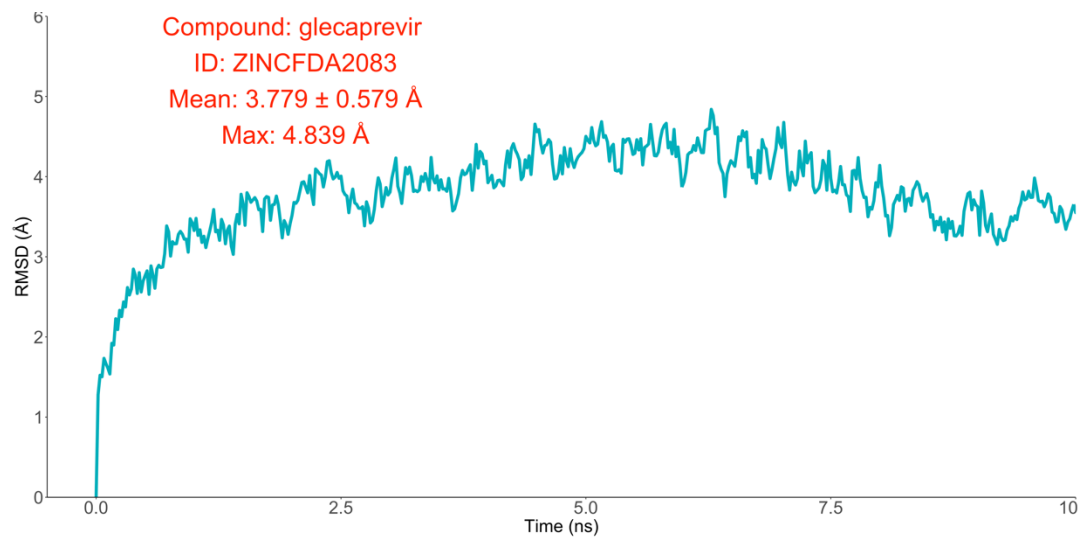

**Fig. S3** RMSD Diagram for MD simulations of the seven selected compounds with the RBD of SARS-CoV-2 spike protein.

RMSF for ZINCFDA754 (imatinib):

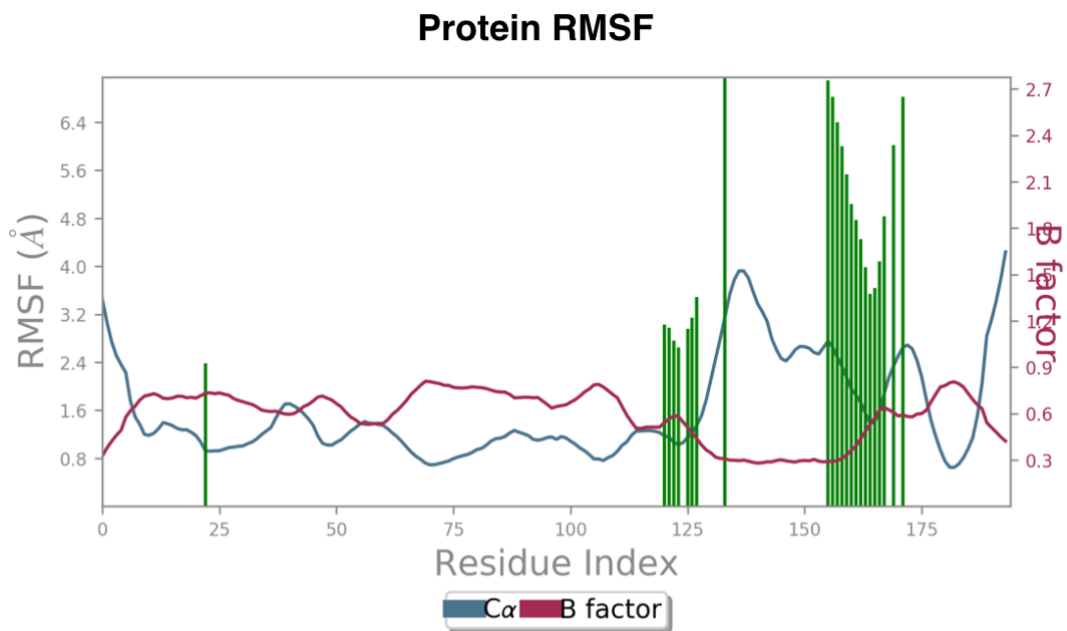

RMSF for Antiviral825:

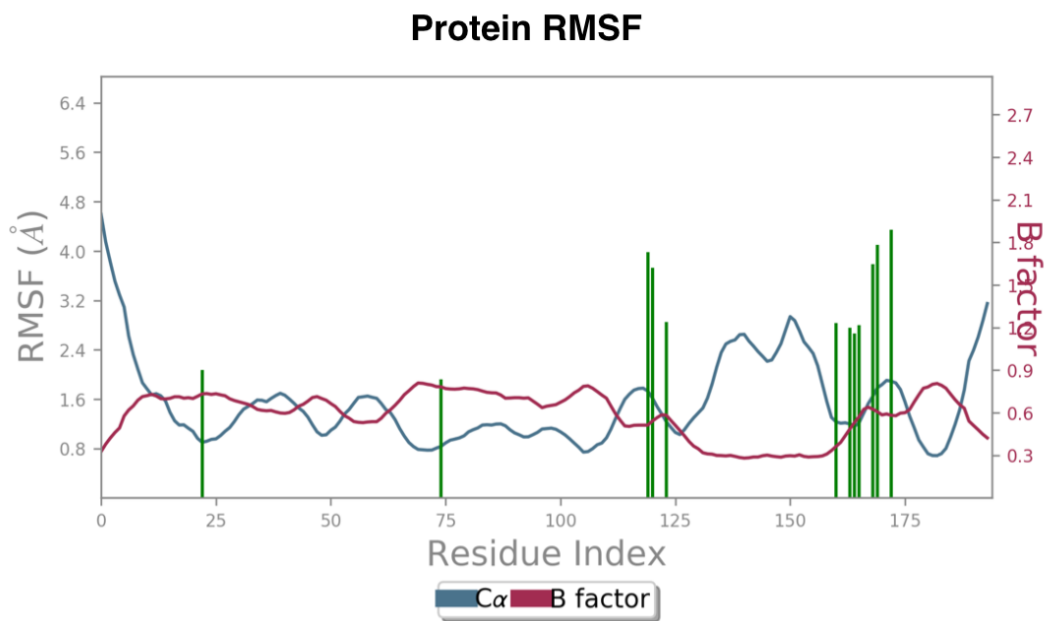

RMSF for Antiviral2038:

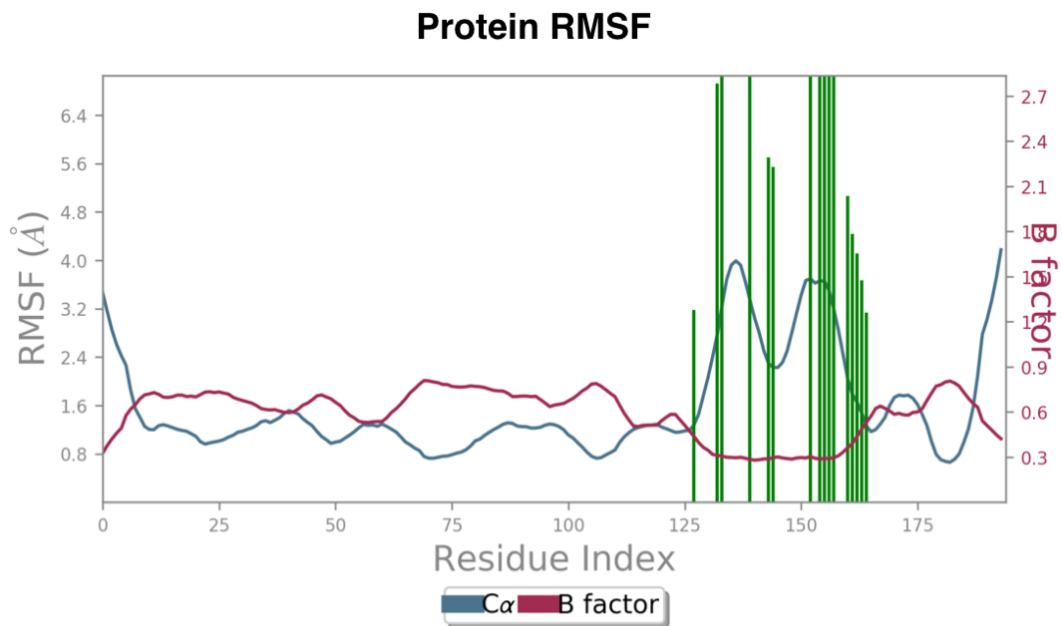

RMSF for Antiviral2981:

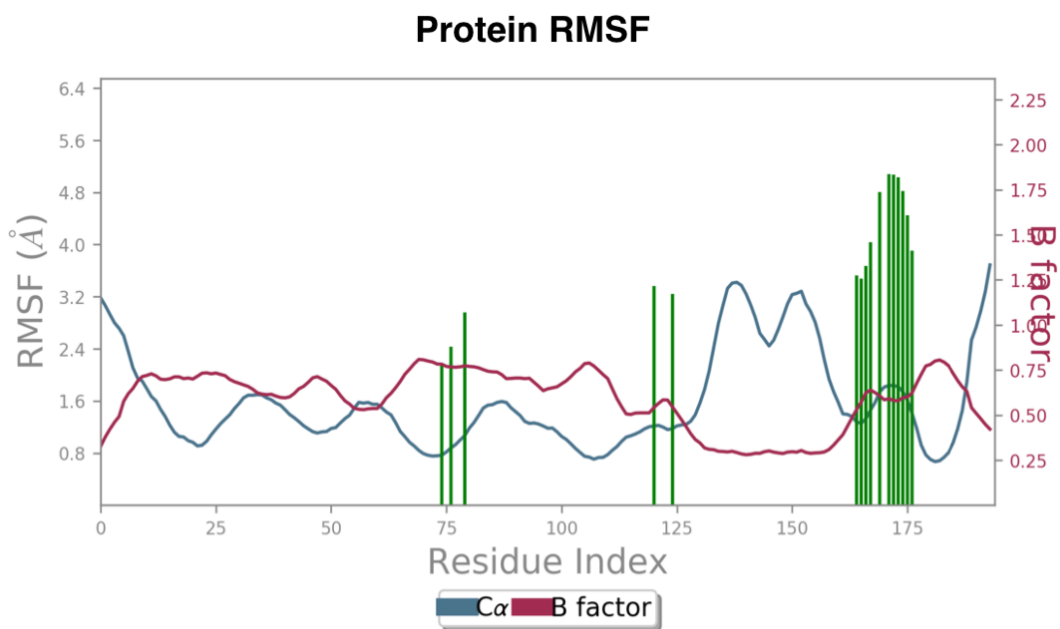

RMSF for ZINCFDA130 (ergotamine):

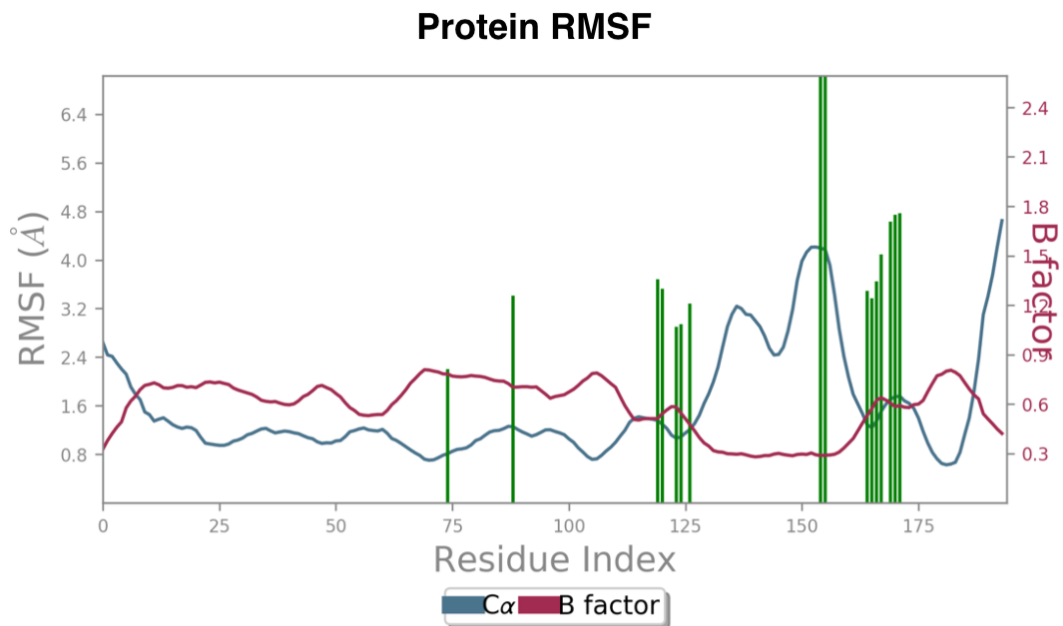

RMSF for ZINCFDA515 (ponatinib):

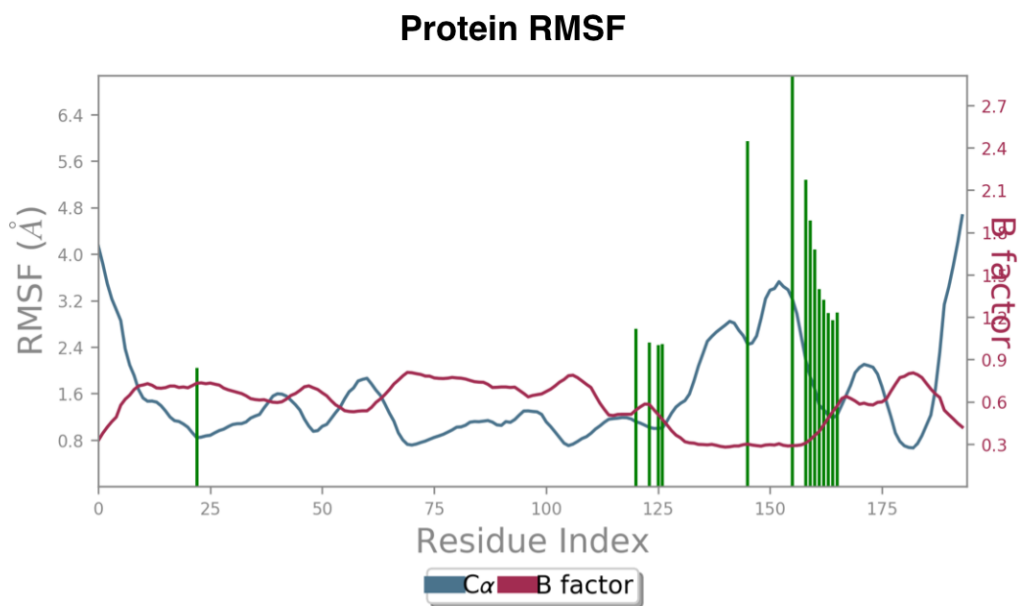



RMSF for ZINCFDA2083 (glecaprevir):

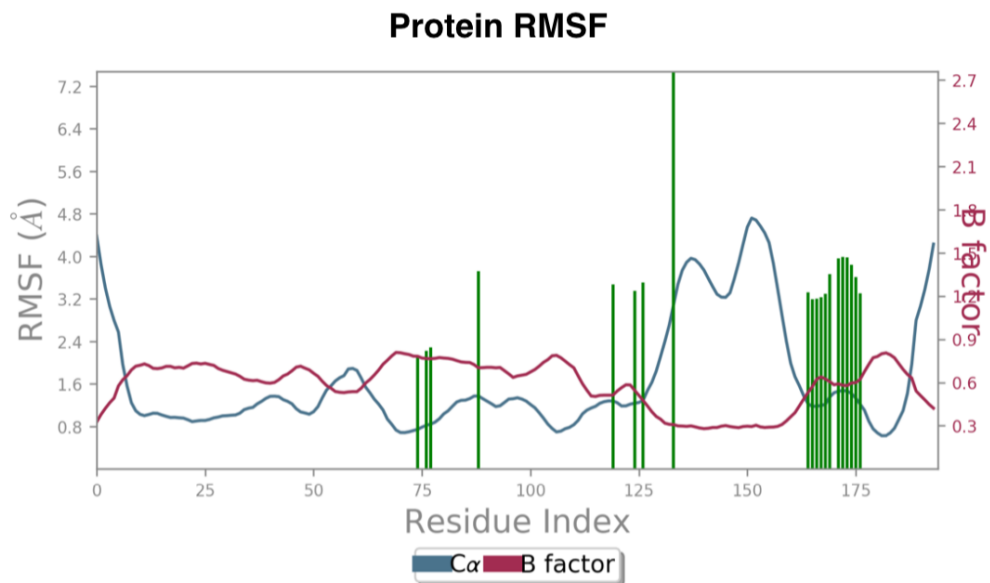

**Fig. S4** RMSF Diagram for MD simulations of the seven selected compounds with the RBD of SARS-CoV-2 spike protein. Green columns are the ligand-protein interaction residues. The fluctuation (blue) was reasonable between 0.5 to 4 Å at the interacted protein residues (green).

**Table S3 – Information of substances screened from initial docking studies.**

| Substance                                         | 2D structure                                                                        | Applications and mechanism of action                                                                                                               | References |
|---------------------------------------------------|-------------------------------------------------------------------------------------|----------------------------------------------------------------------------------------------------------------------------------------------------|------------|
| ZINCFDA754/<br>imatinib/<br>ZINC000019632<br>618  | 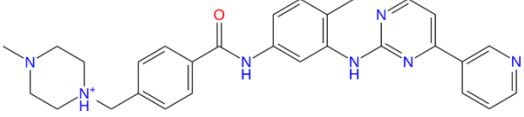   | Leukemia treatment by inhibition of Bcr-Abl tyrosine kinase.                                                                                       | [1]        |
| Antiviral2038 /<br>Z787722876 /<br>ZINC50038784   |    | No reported bioactivity. Antiviral properties based on Enamine predictions.                                                                        |            |
| Antiviral2981 /<br>Z1452532074 /<br>ZINC170674881 |  | Has a molinspiration bioactivity score of 0.35 as GPCR ligand                                                                                      | [1]        |
| Antiviral825 /<br>Z1277226201 /<br>ZINC104169890  |  | Has good molinspiration bioactivity scores as GPCR ligand (0.43), Ion channel modulator (0.38), kinase inhibitor (0.27) and enzyme inhibitor (0.2) | [1]        |

|                                                               |                                                                                                                                                                                                                                                                                                                                                                                                                                                                                          |                                                                                                    |            |
|---------------------------------------------------------------|------------------------------------------------------------------------------------------------------------------------------------------------------------------------------------------------------------------------------------------------------------------------------------------------------------------------------------------------------------------------------------------------------------------------------------------------------------------------------------------|----------------------------------------------------------------------------------------------------|------------|
| <p>ZINCFDA130 /<br/>ergotamine/<br/>ZINC000052955<br/>754</p> | 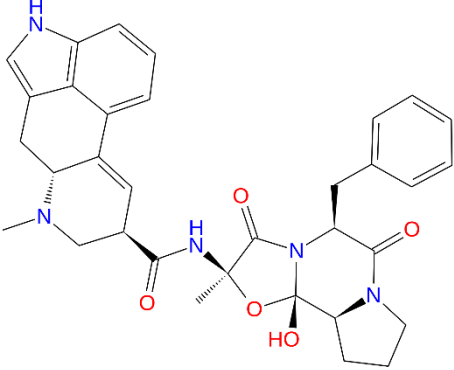 <p>The chemical structure of Ergotamine is a complex ergoline alkaloid. It features a tetracyclic ergoline core with a piperidine ring fused to the indole ring. Substituents include a methyl group on the piperidine nitrogen, a hydroxyl group at the 8-position, and a phenylpropyl chain at the 6-position.</p>                                                                                   | <p>Migraine treatment via acting as an agonist to 5-HT1A, 5-HT1B, 5-HT1D, and 5-HT1F receptors</p> | <p>[2]</p> |
| <p>ZINCFDA2083 /<br/>glecaprevir/<br/>ZINC164528615</p>       |  <p>The chemical structure of Glecaprevir is a large, complex molecule. It consists of a central pyrazole ring substituted with a benzimidazole, a fluorine atom, and a cyclopentane ring. This is linked to a piperazine ring, which is further substituted with a sulfonamide group and a cyclopropyl ring. The molecule is highly functionalized with various heterocyclic and aliphatic groups.</p> | <p>Hepatitis C treatment by NS3/4 protease inhibition</p>                                          | <p>[3]</p> |
| <p>ZINCFDA515 /<br/>ponatinib/<br/>ZINC000036701<br/>290</p>  |  <p>The chemical structure of Ponatinib is a tyrosine kinase inhibitor. It features a central benzamide core. One side of the benzamide is substituted with a piperazine ring and a trifluoromethyl group. The other side is substituted with a propargyl group, which is further linked to an imidazole ring.</p>                                                                                    | <p>Leukemia treatment by inhibition of Bcr-Abl tyrosine kinase</p>                                 | <p>[4]</p> |

**Movie S1.** Molecular dynamics simulation video of SARS-CoV-2 spike protein (RBD) interacting with imatinib.

## References:

1. Sisk, J.M., M.B. Frieman, and C.E. Machamer, *Coronavirus S protein-induced fusion is blocked prior to hemifusion by Abl kinase inhibitors*. The Journal of general virology, 2018. **99**(5): p. 619.
2. Silberstein, S.D., *The pharmacology of ergotamine and dihydroergotamine*. Headache, 1997. **37 Suppl 1**: p. S15-25.
3. Gane, E., et al., *Glecaprevir and pibrentasvir in patients with HCV and severe renal impairment*. New England Journal of Medicine, 2017. **377**(15): p. 1448-1455.
4. Goldman, J.M., *Ponatinib for chronic myeloid leukemia*. 2012, Mass Medical Soc.
